# Supplementary material for: Discovering the molecular differences between right- and left-sided colon cancer using machine learning methods
Source: Springer Nature journal article supplement (doi:10.1186/s12885-020-07507-8), 2020-10-19

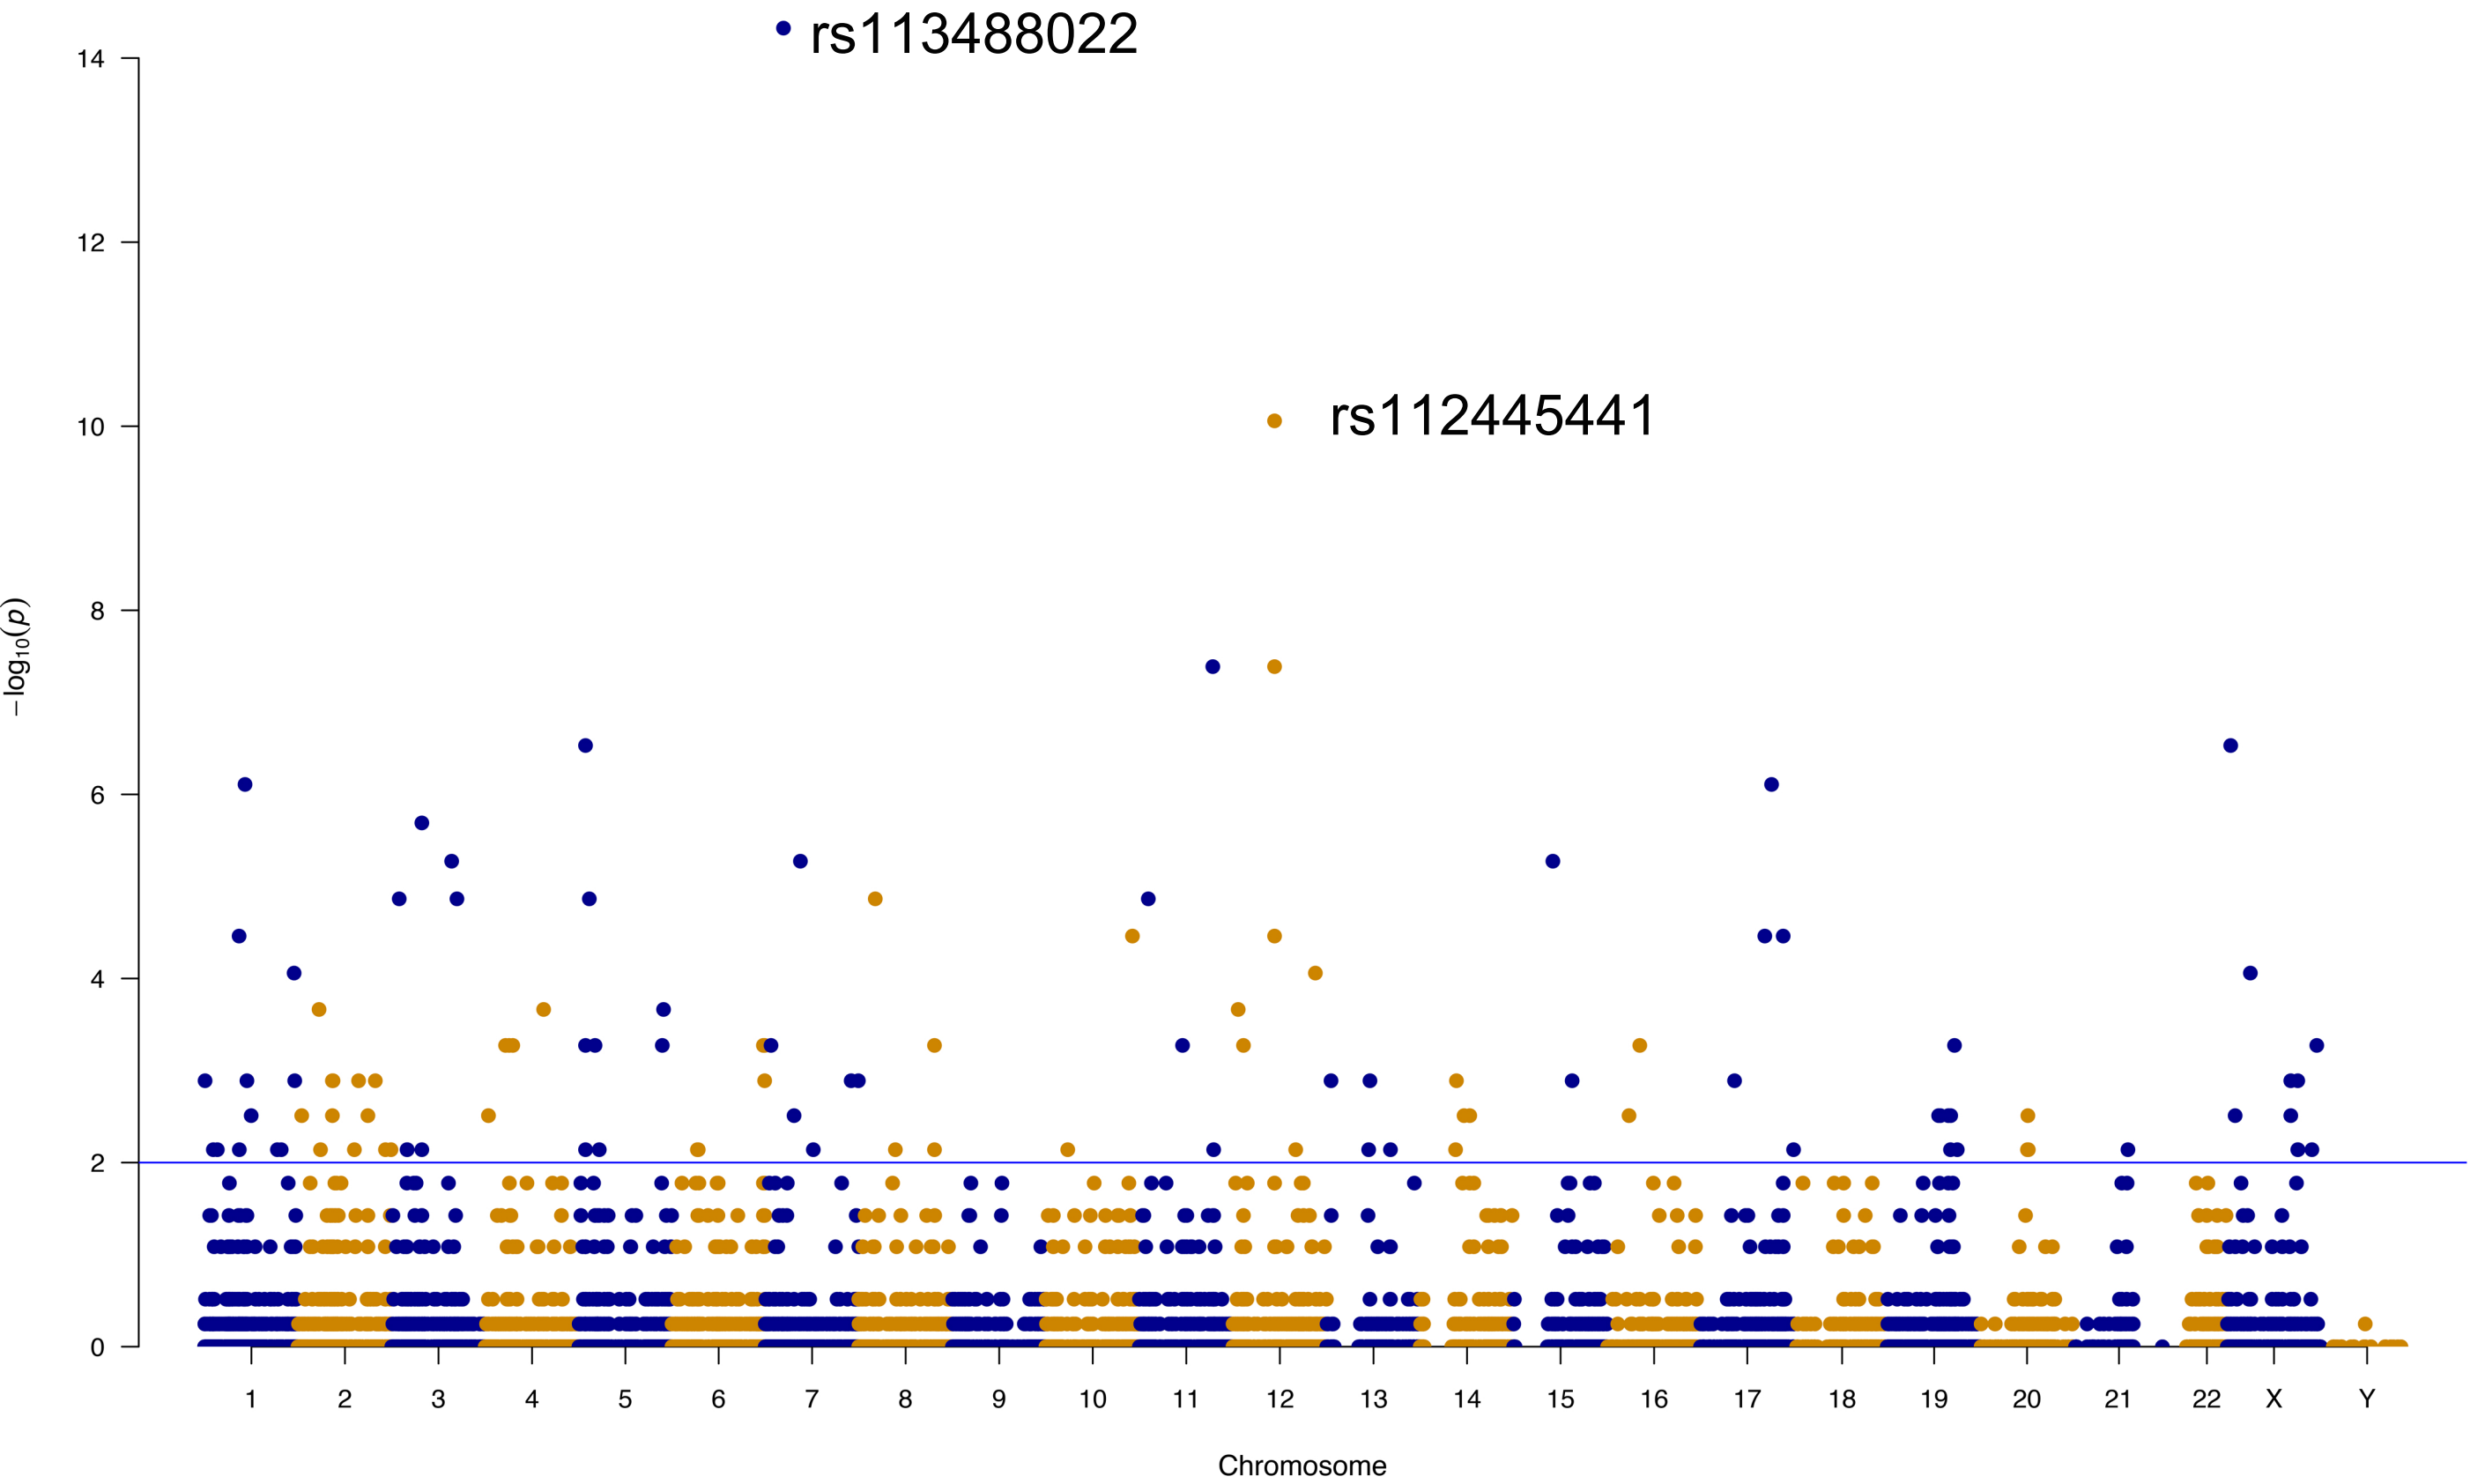

Supplement: MOESM2 [file 18499836]
